# Supplementary material for: Confidence and Prediction Intervals for Pharmacometric Models
Source: PubMed Central journal article supplement — CPT Pharmacometrics Syst Pharmacol. 2018 Mar 25;7(6):360–73. doi: 10.1002/psp4.12286 (PMC6027739; doi:10.1002/psp4.12286), 2018-03-25
Supplement: PSP4-7-360-s002.pdf [file PSP4-7-360-s002.pdf]

**Table S1: Estimates and relative standard errors for different error models for the PK/PD regression case study**

| Parameter | Additive error |         | Proportional error |         | Combined error |         | Exponential error |         |
|-----------|----------------|---------|--------------------|---------|----------------|---------|-------------------|---------|
|           | Estimate       | RSE (%) | Estimate           | RSE (%) | Estimate       | RSE (%) | Estimate          | RSE (%) |
| $E_0$     | 94.55          | 1.7     | 90.13              | 3.6     | 94.10          | 2.5     | 92.12             | 4.0     |
| $EC_{50}$ | 52.30          | 5.6     | 51.93              | 8.7     | 52.62          | 6.4     | 54.07             | 9.2     |
| $E_{max}$ | 22.94          | 5.6     | 24.61              | 3.7     | 23.55          | 4.4     | 22.33             | 4.0     |
| $\gamma$  | 1.51           | 9.0     | 1.62               | 10.8    | 1.59           | 9.2     | 1.64              | 10.4    |
| -2LL      | 3919.59        |         | 3911.30            |         | 3864.21        |         | 3888.52           |         |
| BIC       | 3950.84        |         | 3942.54            |         | 3901.70        |         | 3919.76           |         |

Estimates for Emax model ( $f(c, \theta) = E_0 + (E_{max} - E_0) \cdot c^\gamma / (EC_{50}^\gamma + c^\gamma)$ ) are displayed with the RSE in % in brackets. The last two rows show the -2\*log-likelihood (-2LL) and the Bayesian information criterion (BIC), respectively.

RSE: Relative standard error
